1 **Computationally designed GPCR quaternary structures bias signaling pathway activation**

2

3 Paradis, J. S.<sup>¶1</sup>, Feng, X.<sup>¶2,§</sup>, Murat, B.<sup>#1</sup>, Jefferson R.<sup>#2</sup>, Szpakowska, M.<sup>3</sup>, Hogue, M.<sup>1</sup>, Bergkamp,  
4 N. D.<sup>4</sup>, Heydenreich, F.M.<sup>1</sup>, Smit, M. J.<sup>4</sup>, Chevigne, A.<sup>3</sup>, Bouvier, M.<sup>§1</sup>, Barth, P.<sup>§2</sup>

5

6 **Affiliations**

7 1: Department of Biochemistry and Molecular Medicine, Institute for Research in Immunology and  
8 Cancer (IRIC), Université de Montréal, Montréal, Quebec, Canada H3T 1J4

9 2: Interfaculty Institute of Bioengineering, Ecole Polytechnique Federale de Lausanne, Lausanne,  
10 CH-1015, Switzerland

11 3: Department of Infection and Immunity, Immuno-Pharmacology and Interactomics, Luxembourg  
12 Institute of Health, Esch-sur-Alzette, Luxembourg

13 4: Amsterdam Institute for Molecules, Medicines and Systems (AIMMS), Division of Medicinal  
14 Chemistry, Faculty of Sciences, Vrije Universiteit, Amsterdam, The Netherlands

15 §: Current address: Structural Biology Program, Van Andel Institute, Grand Rapids, MI, USA

16 ¶, # Contributed equally

17 § Correspondences should be addressed to:

18 Patrick Barth, Interfaculty Institute of Bioengineering, Ecole Polytechnique Federale de Lausanne,  
19 Lausanne, CH-1015, Switzerland, [patrick.barth@epfl.ch](mailto:patrick.barth@epfl.ch)

20 Michel Bouvier, Institute for Research in Immunology and Cancer, Université de Montréal  
21 2900, Boulevard Édouard-Montpetit; email: [michel.bouvier@umontreal.ca](mailto:michel.bouvier@umontreal.ca)

22 **Abstract**

23 Communication across membranes controls critical cellular processes and is achieved by receptors  
24 translating extracellular signals into selective cytoplasmic responses. While receptor tertiary  
25 structures can now be readily characterized, receptor associations into quaternary structures are  
26 very challenging to study and their implications in signal transduction remain poorly understood.  
27 Here, we report a computational approach for predicting membrane receptor self-associations, and  
28 designing receptor oligomers with various quaternary structures and signaling properties. Using this  
29 approach, we designed chemokine receptor CXCR4 dimers with reprogrammed stabilities,  
30 conformations, and abilities to activate distinct intracellular signaling proteins. In agreement with our  
31 predictions, the designed CXCR4s dimerized through distinct conformations and displayed different  
32 quaternary structural changes upon activation. Consistent with the active state models, all  
33 engineered CXCR4 oligomers activated the G protein  $G_i$ , but only a few specific dimer structures  
34 also recruited  $\beta$ -arrestins. Overall, we demonstrate that quaternary structures represent an  
35 important unforeseen mechanism of receptor biased signaling and reveal the existence of a  
36 conformational switch at the dimer interface of several G protein-coupled receptors including  
37 CXCR4,  $\mu$ -Opioid and type-2 Vasopressin receptors that selectively control the activation of G  
38 proteins vs  $\beta$ -arrestin-mediated pathways. The approach should prove useful for predicting and  
39 designing receptor associations to uncover and reprogram selective cellular signaling functions.

40

## 41 **Introduction**

42 A wide range of membrane proteins, including single-pass receptor tyrosine kinases,  
43 cytokine receptors and ion channels, function through the folding and association of several  
44 polypeptide chains into specific quaternary structures. The functional role of oligomerization in other  
45 membrane protein classes remains controversial as the observation of receptor associations is very  
46 sensitive to the experimental conditions and techniques<sup>1-4</sup>. Receptors from the largest class of G  
47 protein-coupled receptors (GPCRs) were often observed as oligomers in electron microscopy, X-ray  
48 crystallography and BRET studies<sup>5-11</sup>. However, when trapped as monomers in nanolipid disks,  
49 GPCRs, such as rhodopsin and  $\beta$ 2 adrenergic receptor, remained functional, binding and activating  
50 their primary intracellular signaling G proteins<sup>12,13</sup>. Structural studies suggested that different  
51 GPCRs can self-associate through distinct transmembrane helical (TMH) interfaces. Computational  
52 modeling approaches based on molecular dynamics simulations have also identified different  
53 possible modes and lifetimes of GPCR associations<sup>14,15</sup> but the functional relevance of these  
54 oligomeric forms remain poorly understood<sup>5-7,16-22</sup>. For example, chemokine receptor CXCR4  
55 signaling is linked to the formation of nanoclusters at the cell membrane<sup>23</sup>. Such nanoclusters are  
56 controlled by key structural motifs at the receptor TMH surface but do not involve the receptor  
57 dimeric interface observed in X-ray structures<sup>10</sup>.

58

59 In principle, computational design techniques can probe and decipher the importance of  
60 protein associations by reprogramming protein-protein interactions or designing competitive binding  
61 inhibitors, but these approaches have mostly been applied to soluble proteins<sup>24-26</sup>. Applications to  
62 membrane proteins have been limited to the design of single-pass TMH associations<sup>27-29</sup>.

63

64 Here, we developed a computational approach for modeling and designing quaternary  
65 structures of multi-pass membrane receptors. Using the method, we engineered the chemokine  
66 receptor CXCR4 to associate into distinct oligomeric structures that recruited and activated

67 intracellular signaling proteins differently. Altogether, our study reveals that quaternary structures  
68 constitute important unforeseen structural determinants of GPCR biased signaling and identified a  
69 common conformational switch at the dimer interface of several GPCRs that control G protein  
70 versus  $\beta$ -arrestin signaling. The approach is general and should prove useful for reprogramming  
71 cellular functions through designed receptor associations.

72

## 73 **Results**

### 74 **Computational approach for modeling and designing multi-pass receptor oligomers**

75 We developed an approach to model and design multi-pass membrane protein associations  
76 with precise quaternary structures, stabilities and signaling functions (**Fig.1a,b, Supplementary**  
77 **Fig.S1**). The method builds GPCR monomeric structures in distinct active and inactive states,  
78 docks them to identify possible modes of protomer associations in homodimers and design the  
79 binding interfaces to generate quaternary structures with distinct dimer stabilities, conformations  
80 and propensity to recruit and activate specific intracellular signaling proteins. In this study, an active  
81 state model refers to a GPCR in an active state conformation modelled by using a structure bound  
82 to G-protein or  $\beta$ -arrestin as template.

83

84 We applied the approach to reprogram the homo-dimeric structure and function of CXCR4,  
85 a GPCR from the chemokine receptor family. We chose CXCR4 because it is a critical signaling  
86 hub involved in immune responses<sup>7,30</sup> and HIV infection, as well as a receptor for which multiple  
87 experimental lines of evidence supporting the formation of constitutive homo-oligomers and its  
88 regulation by ligands exists<sup>10,11</sup>.

89

90 We designed CXCR4 receptor oligomers with different binding affinities and quaternary  
91 structures to elucidate the role of self-association in distinct CXCR4 intracellular signaling functions.  
92 Specifically (**Fig.1a,b, Supplementary Fig.S1**), we modeled CXCR4 WT monomers in inactive and

93 active signaling states. For instance, the active state model of CXCR4 was obtained from the active  
94 state structure of the homologous viral GPCR US28 (PDB: 4XT1) using the method IPHoLD which  
95 integrates homology modeling and ligand docking<sup>31</sup>. The CXCR4 WT monomers in the inactive  
96 state were taken from the antagonist-bound CXCR4 WT structure (PDB: 3ODU) after energy  
97 minimization of the X-ray coordinates. The CXCR4 WT monomers were assembled into inactive or  
98 active state dimers along different dimer binding interfaces involving TMHs 4, 5 and 6. We found  
99 that, in both the inactive and active states, the dimer WT models populated primarily an open-dimer  
100 conformation similar to that observed in the antagonist-bound receptor X-ray structure but also, to a  
101 lesser extent, a distinct closed-dimer conformation (**Fig.1c-f, Supplementary Table S1,**  
102 **Supplementary Fig.S2, Extended Data Set 1**). The distribution between dimer conformations can  
103 be deduced from the difference in binding energy (strength of association) at the distinct dimer  
104 interfaces (**Supplementary Table S1**). Interestingly, while the major open dimer conformation  
105 remains very similar in both signaling states, the minor closed form differs by a slight rotation  
106 around TMH5 between the inactive and active state conformations of the receptor (**Supplementary**  
107 **Fig.S2**).

108

109 To elucidate the function of these different quaternary structures, we then designed TMH  
110 and loop binding surfaces to selectively stabilize either the open-dimer or the closed-dimer  
111 conformation of the inactive and active state dimer models. The method first searches for  
112 combinations of mutations and conformations that modulate the intermolecular interactions between  
113 the monomers without affecting the monomer's intrinsic conformational stability and functions. Any  
114 design that modifies the dimer binding energies as intended but significantly affect monomer  
115 stability is systematically discarded (see **Methods**). After each round of design, the designed  
116 CXCR4 monomers are assembled into dimers to predict the effects of the designed sequence-  
117 structure features on the distribution of quaternary structures in distinct signaling states. Lastly, the  
118 G protein Gi and  $\beta$ -arrestin are docked and assembled onto the designed CXCR4 active state

119 dimers to predict whether the engineered receptors would effectively recruit and activate these  
120 intracellular signaling proteins. The cycles of design, flexible docking and ternary complex assembly  
121 are repeated until the calculations converge to significant predicted reprogramming of the  
122 quaternary structure and functional selectivity of the designed CXCR4 oligomers (**Fig.1a,b,**  
123 **Supplementary Fig.S1**).

124

### 125 **Designing CXCR4 dimers with selective conformations and intracellular functions**

126 From our *in silico* design screen, we first selected three engineered CXCR4s predicted to  
127 dimerize with greater propensity than CXCR4 WT in the open-dimer conformation (**Fig.1c,e,f,**  
128 **Supplementary Table S1**). The designs involved key conformational lock motifs stabilizing the  
129 open-dimer conformation (**Fig.1c,e,f**). The L194<sup>5.33</sup>K and the L194<sup>5.33</sup>R design introduced a set of  
130 strong and conformationally selective polar contacts between the extracellular sides of TMH5s of  
131 two protomers (**Fig.1c**). The triplet design, formed by the V198<sup>5.37</sup>F-V197<sup>5.36</sup>M mutation on one  
132 protomer and the V198<sup>5.37</sup>W on the other protomer, encoded a new network of optimal hydrophobic  
133 contacts bridging the membrane-embedded core of the dimer-binding interface between TMH5s  
134 (**Fig.1c**). Similarly to WT, when modeled in the active state, these designs primarily dimerized in an  
135 open conformation that could readily form tight active state complex structures with both Gi and β-  
136 arrestin (**Fig.1f, Supplementary Table S1, Supplementary Fig.S3**).

137

138 Conversely, we also engineered two binding surfaces predicted to instead stabilize the  
139 closed-dimer conformation (**Fig.1d,e,f, Supplementary Table S1**). We selected these “closed-  
140 dimer-stabilizing” designs, because, unlike WT, they preferentially assemble into closed-dimer  
141 conformations that form tight active-state complex structures with Gi but not with β-arrestin (**Fig.1b,**  
142 **f, Supplementary Fig.S3**). We found that steric hindrance prevents the optimal interaction of β-  
143 arrestin’s finger loop in the intracellular binding groove of CXCR4 when the receptor occupies the

144 closed-dimer conformation (**Supplementary Fig.S4**). Both designed interfaces (that we name  
145 W195<sup>5.34</sup>L and N192<sup>ECL2</sup>W design switches) involved several conformational switch motifs  
146 stabilizing the closed-dimer conformation, especially when the receptor occupies the signaling  
147 active state (**Fig.1f, Supplementary Table S1**). The W195<sup>5.34</sup>L design switch increased the packing  
148 of TMH4 and 5 across the extracellular side of the binding interface, stabilizing the closed dimer  
149 conformation through additional van der Waals contacts (**Fig.1d**). The N192<sup>ECL2</sup>W design switch  
150 induced several conformational changes in a neighboring layer of residues buried at the dimer  
151 interface, creating new key hydrophobic interactions stabilizing the closed form (**Fig.1d**).

152

153 By simulating the association for the WT and the designed CXCR4 monomers, we identified  
154 important changes in the stability and hence distribution of the dimer conformations between the  
155 inactive and active states of the receptor (**Fig.1e, f, Supplementary Table S1**). Concerning the WT  
156 receptor, we observed that the closed dimer conformation was significantly more stable in the active  
157 state, indicating a relative shift toward the closed form in that state. By contrast, virtually no  
158 difference in the closed dimer conformation stability between the inactive and active states was  
159 observed for the “open-dimer-stabilizing” designs (L194<sup>5.33</sup>R switch). The largest changes in dimer  
160 populations between inactive and active signaling states were observed for the “closed-dimer-  
161 stabilizing” designs (W195<sup>5.34</sup>L switch). Despite a significant stabilization of the closed dimer  
162 conformation, the open dimer remained the most stable form in the inactive state and the W195<sup>5.34</sup>L  
163 variant still predominantly populated the open-dimer structure in that state. However, the distribution  
164 between open and closed conformation of the W195<sup>5.34</sup>L variant was reversed in the active state  
165 and the closed form became the most stable and dominant structure. Overall, the W195<sup>5.34</sup>L design  
166 was found to be most stabilized in the active state closed-dimer form (**Supplementary Table S1**).  
167 In addition to the dimer conformation distribution, our calculations provided insights into the  
168 dimerization propensity of the different CXCR4 variants (**Supplementary Table S2**). In the inactive  
169 state, the “closed-dimer-stabilizing” N192<sup>ECL2</sup>W and W195<sup>5.34</sup>L designs formed weaker dimers while

170 the “open-dimer-stabilizing” L194<sup>5.33</sup>R design formed stronger dimers than WT, suggesting that the  
171 “closed-dimer-stabilizing” designs would occupy more often the monomeric state. The reverse  
172 scenario was observed in the active state. While the dimerization propensity of the L194<sup>5.33</sup>R design  
173 was lower than WT, the W195<sup>5.34</sup>L design formed the most stable active state dimers among all  
174 variants.

175

## 176 **Designed CXCR4 receptors dimerize in distinct conformations**

177 We validated the predicted designed oligomeric CXCR4 structures and functions using an  
178 ensemble of cell-based experiments.

179

180 We first measured constitutive and CXCL12 agonist-promoted CXCR4 dimerization in living  
181 HEK293T cells by BRET using CXCR4-RLuc and CXCR4-YFP constructs (**Fig.2a**). A large  
182 constitutive BRET signal was observed for the WT receptor which, as previously reported<sup>10,11</sup>,  
183 further increased upon activation by agonist (**Fig.2a, Supplementary Fig.S7**) (**Supplementary**  
184 **Fig.S6** for CXCR4 cell surface expression levels). This increase in BRET can be interpreted as a  
185 change in conformation within dimers and a shift toward the closed dimer form, as suggested by our  
186 calculations, or as an increase in dimer population upon activation. Consistent with the “open-  
187 dimer-stabilizing” designs associating in a similar open conformation than WT, the constitutive  
188 BRET signals measured for these designs (L194<sup>5.33</sup>K/L194<sup>5.33</sup>K, L194<sup>5.33</sup>R/L194<sup>5.33</sup>R,  
189 V198<sup>5.37</sup>F/V197<sup>5.36</sup>M-V198<sup>5.37</sup>W), were either similar to or slightly larger than WT. However, unlike  
190 what is seen for the WT receptor, we did not observe any significant BRET increase upon agonist  
191 stimulation. These results suggest that stabilization of the open-dimer conformation prevents further  
192 agonist-induced conformational changes across the binding interface and locks the receptor dimer  
193 in a constitutive open-dimer conformation, consistent with the lack of stabilization of the closed  
194 dimer form upon receptor activation in our simulations. In the specific case of the L194<sup>5.33</sup>K design,  
195 the lack of BRET increase upon stimulation could also result in part from the designed receptors



196 occupying more frequently the dimer state than the WT receptor, even without stimulus, as  
197 suggested by the significantly increased constitutive BRET signals measured for that design.

198

199 The BRET signals measured for the “closed-dimer-stabilizing” designs  
200 (N192<sup>ECL2</sup>W/N192<sup>ECL2</sup>W, W195<sup>5.34</sup>L/W195<sup>5.34</sup>L) without ligand stimulus were significantly lower than  
201 WT. These observations are consistent with the designs still predominantly occupying the open  
202 conformation in the inactive state (**Supplementary Table S1**) and forming overall weaker dimers  
203 than WT (**Supplementary Table S2**) that may result in a greater proportion of receptor in the  
204 monomeric state. Upon agonist stimulation, however, we observed a larger increase in net BRET  
205 signal compared to WT, especially for W195<sup>5.34</sup>L in agreement with the large predicted changes in  
206 dimer conformation and dimerization propensity upon receptor activation (**Supplementary Tables**  
207 **S1 and S2**). These results suggest that the “closed-dimer-stabilizing” receptors constitutively  
208 dimerize less stably than WT and display stronger propensity to associate in the closed form upon  
209 agonist stimulation.

210

211 Overall, we observed a strong correlation across receptor variants between the predicted  
212 change in closed-dimer stability and the increase in BRET upon receptor activation  
213 (**Supplementary Fig.S5**). These results suggest that major conformational changes and population  
214 shifts towards the closed dimer form can readily occur in the active state when triggered by strong  
215 switching mutations such as W195<sup>5.34</sup>L.

216

217 In summary, the BRET measurements validate the designed CXCR4 dimer structures and indicate  
218 that receptor dimers with distinct strengths of associations and quaternary conformations can be  
219 rationally engineered using our approach.

220

221 **Designed CXCR4 receptors activate distinct intracellular signaling proteins**

222           According to our calculations, the two classes of designed receptors should display distinct  
223 propensity to bind and activate intracellular signaling proteins. While the receptors dimerizing in the  
224 open conformation should recruit both Gi and  $\beta$ -arrestin, the receptors preferentially dimerizing in a  
225 closed conformation should couple strongly to Gi only.

226

227           To validate these predictions, we measured Gi activation and  $\beta$ -arrestin recruitment to  
228 CXCR4 using BRET-based assays in HEK293 cells. Consistent with the active state modeling, both  
229 classes of designed CXCR4 dimers were able to activate Gi similarly to WT, as measured by the  
230 agonist-induced dissociation of the heterotrimeric Gi protein (**Fig.2b**) and the inhibition of cAMP  
231 production (**Fig.2c**). As shown in **Supplementary Fig.S6d**, HEK293 cells endogenously express a  
232 low level of CXCR4 that result in a background CXCL12-promoted cAMP inhibition that can easily  
233 be distinguished from the signal generated by the transfected WT or mutant receptors (**Fig.2c**). No  
234 such background signal could be observed in the BRET-based Gi activation or  $\beta$ -arrestin  
235 recruitment assays due to their lower level of amplification. Both assays clearly indicated that the  
236 mutations did not affect the ability of the receptor to activate Gi.

237

238            $\beta$ -arrestin recruitment was measured using BRET reporting directly the interaction between  
239 CXCR4-RLuc and  $\beta$ -arrestin2-YFP (in HEK293 cells)<sup>32</sup> or ebBRET<sup>33</sup> monitoring the interaction  
240 between  $\beta$ -arrestin2-RLuc and the lipid-modified rGFP-CAAX at the cell membrane. Both assays  
241 consistently showed that the “open-dimer-stabilizing” designs recruited  $\beta$ -arrestin very effectively  
242 and similarly to WT upon agonist stimulus (**Fig.3a, Supplementary Fig.S8**). On the contrary, and in  
243 agreement with our predictions, the “closed-dimer-stabilizing” designs had largely impaired  $\beta$ -  
244 arrestin recruitment abilities. Specifically, while  $\beta$ -arrestin2 coupling to the N192<sup>ECL2</sup>W design was  
245 considerably reduced compared to WT, virtually no recruitment signals could be measured for the  
246 W195<sup>5.34</sup>L design (**Fig.3a, Supplementary Fig.S8**). The differences in  $\beta$ -arrestin recruitment were

247 not due to difference in the expression levels of the different mutants as they showed similar cell  
248 surface expression as assessed by ELISA (**Supplementary Fig.S6**).

249

250 Consistent with a role for  $\beta$ -arrestin in ERK activation<sup>34</sup>, the W195<sup>5,34</sup>L design showed a  
251 reduced level of ERK phosphorylation compared to WT, suggesting that the scaffolding function  
252 supported by  $\beta$ -arrestin was affected (**Fig.3b**). Because of a high background CXCL12-promoted  
253 ERK activity in HEK293 cells, the ERK assay was performed in U87.GM cells that lack endogenous  
254 CXCR4 in which WT- and W195<sup>5,34</sup>L-CXCR4 were heterologously expressed at equivalent  
255 expression levels (**Supplementary Fig.S6e**). These results validated our designed functional  
256 quaternary switch and revealed that selective receptor signaling functions can be modulated by  
257 specific oligomeric structures.

258

### 259 **New structural mechanism of GPCR-mediated biased signaling**

260 Overall, our designs reveal an unforeseen structural mechanism of GPCR-mediated biased  
261 signaling. Molecular determinants of biased signaling identified so far were primarily encoded by  
262 specific sequence motifs and conformations of receptor monomers<sup>35</sup>. However, Gi-mediated  
263 CXCR4 signaling triggering important functions such as chemotaxis was recently found to depend  
264 on the formation of specific receptor nanoclusters at the cell surface<sup>23</sup>. These oligomers are  
265 controlled by specific structural motifs on the lipid-exposed intracellular surface of TMH6, that is  
266 remote from the dimer interface studied here (**Fig.4a**). Mutations of the corresponding residues on  
267 TMH6 resulted in nanocluster-defective receptor variants with severely impaired Gi-mediated  
268 signaling, suggesting that this CXCR4 oligomerization surface constitutes a Gi bias signaling  
269 switch. On the other hand, our study demonstrates that the extracellular dimerization surface  
270 primarily constituted by TMH5 residues controls the selective recruitment of the other main class of  
271 GPCR signaling and regulating partners,  $\beta$ -arrestin. Since Gi coupling remains insensitive to the

272 precise dimer structure mediated by TMH5 contacts, we propose that this binding surface  
273 constitutes a  $\beta$ -arrestin bias signaling switch.

274

275 Although we cannot exclude the possibility that the compromised ability of the closed-dimer  
276 stabilized receptor to recruit  $\beta$ -arrestin may be linked to a defect in their phosphorylation, our  
277 modeling suggest that the active close-dimer conformation prevent the engagement of the  $\beta$ -  
278 arrestin finger loop of the receptor by the cradle core of the receptor through steric hindrance  
279 (**Supplementary Fig.S4**).

280

281 Since the structural motifs identified at the surface of CXCR4 monomers control a key  
282 signaling pathway conserved in most GPCRs, we wondered whether similar binding surfaces could  
283 be identified in other receptors. We first performed a sequence alignment of CXCR4s from various  
284 organisms and found that the native residues at the designed dimerization hotspot positions were  
285 highly conserved in CXCR4s through evolution, supporting an important functional role for this  
286 region of the receptor (**Fig.4b**). Strikingly, a similar analysis revealed that these positions are poorly  
287 conserved in other human chemokine receptors with the exception of W195<sup>5.34</sup> (**Fig.4b**).  
288 Interestingly, while no other chemokine receptors have been crystallized in a dimeric form involving  
289 TMH5-mediated contacts, the position of W5.34 in CXCR1 (2LNL), CCR2 (5T1A), CCR5 (4MBS)  
290 and Y5.34 in chemokine-related US28 (4XT1) was found to be superimposable to that in CXCR4  
291 (**Fig.4c**). We also found conserved aromatic residues at position 5.34 in P2Y and other peptide-  
292 binding receptors which are known to dimerize (**Fig.4b**).

293

294 Since a single mutation at that position is sufficient to disrupt  $\beta$ -arrestin recruitment, these  
295 findings suggest that this particular position may constitute a general  $\beta$ -arrestin bias signaling  
296 switch for several class A GPCRs. To validate this hypothesis, we investigated the effect of

297 mutating the native aromatic residue at position 5.34 in two additional strongly dimerizing GPCRs,  
298 the mu opioid receptor ( $\mu$ OR) and the type-2 vasopressin receptor (V2R), that are amongst the  
299 peptide-binding receptor subfamily with an aromatic residue at position 5.34 and 5.33 respectively.  
300 The native tryptophan was mutated to an alanine to assess its role on the receptor signaling  
301 functions. Receptor signaling was measured using distinct BRET sensors monitoring  $\beta$ -arrestin and  
302 G $\alpha$ o for  $\mu$ OR, and  $\beta$ -arrestin, and Gs for V2R (**Fig.5**). While signaling through the G proteins was  
303 affected by the W5.33A mutation in V2R and W5.34A in  $\mu$ OR (V2R: 85% and  $\mu$ OR: 61% of WT  
304 efficacy, **Fig.5**),  $\mu$ OR and V2R receptor mutants were more strongly impaired in  $\beta$ -arrestin signaling  
305 (< 25% of WT efficacy, **Fig.5**). These results indicate that this aromatic residue largely controls the  
306 signaling efficacy through the  $\beta$ -arrestin pathway in distinct peptide-binding GPCRs and may  
307 constitute a general signaling switch in several GPCRs.

308

309 To better understand the structure-function underpinnings of the mutational effects and  
310 assess whether a common structural mechanism underlies W5.34's function in the studied peptide-  
311 binding receptors, we investigated the structural impact of the tryptophan to alanine substitution.  
312 We focused our analysis on  $\mu$ OR, as a broad range of structural and functional evidence indicate  
313 that this receptor strongly homodimerizes in cell membranes<sup>36,37</sup>. In particular, a high-resolution  
314 structure of the murine  $\mu$ OR in the inactive state revealed a homodimer stabilized by an extensive  
315 binding interface between TMH5 and TMH6. Using our computational quaternary structure  
316 modeling approach, we modeled WT and W5.34A  $\mu$ OR homodimers in active signaling complexes  
317 bound to either G-protein Gi or  $\beta$ -arrestin. Our simulations revealed that  $\mu$ OR in the active signaling  
318 state mainly adopts a major "open" and a minor "wide-open" homodimer conformational state  
319 (**Supplementary Fig.S9**). The open dimer form of  $\mu$ OR was found to strongly bind to  $\beta$ -arrestin,  
320 while the wide-open dimer interacted considerably less well with that protein (**Supplementary**  
321 **Table S3**). By contrast, both homodimer conformations were able to strongly recruit Gi. W5.34 was

322 found at the dimer interface of all  $\mu$ OR homodimers but involved in different sets of interactions.  
323 Consequently, the W5.34A mutation displayed distinct effects on the dimer structures, destabilizing  
324 the major open dimer and stabilizing the minor wide-open form (**Supplementary Table S3**). The  
325 simulations corroborate the experimental observations and provide a structural explanation as to  
326 why W5.34A preferentially affects signaling through  $\beta$ -arrestin.

327

328 Overall, our findings imply that W5.34 controls the signaling of CXCR4 and  $\mu$ OR through the  
329  $\beta$ -arrestin signaling pathway by acting as a conformational switch of quaternary structure and  
330 suggest that this structural mechanism may be common to several GPCRs. However, this may not  
331 be a universal rule since other GPCRs (e.g. rhodopsin, beta 1 adrenergic, EP3, kappa opioid  
332 receptors) may dimerize through alternative dimer interfaces involving TMHs 1,2,7 and 8 (e.g. PDB:  
333 6OFJ, 3CAP, 4GPO, 6AK3, 4DJH) and use other functional selectivity switches.

334

### 335 **Conclusion**

336 Membrane protein oligomers are ubiquitously observed in cell membranes and have been  
337 widely investigated using structural, spectroscopic and mutagenesis approaches<sup>38</sup>. However, how  
338 specific self-associations and quaternary structures control selective protein functions has remained  
339 elusive for many classes of multi-pass membrane proteins. We developed a general computational  
340 modeling and design approach that enabled the precise design of binding surfaces and interactions  
341 to perturb native or create novel receptor oligomeric structures and associated functions.

342

343 A large fraction of GPCRs can activate multiple signaling pathways. This promiscuity has  
344 proven a challenge for the development of selective therapeutics since drugs targeting the  
345 canonical extracellular ligand binding site of GPCRs often trigger several intracellular functions  
346 leading to undesirable side-effects<sup>39</sup>. In this study, we uncovered and engineered hotspot

347 dimerization conformational switches on the extracellular side of CXCR4 and  $\mu$ OR that controlled  
348 the precise receptor dimeric structure and the selective activation of intracellular signaling  
349 pathways. Interestingly, we also identified a biased signaling hotspot at the same location in  
350 another strongly homodimerizing peptide-binding GPCR, V2R, but for which a high-resolution  
351 structure has not yet been determined. Altogether, the results suggest that the position 5.34 may  
352 act as a general dimerization conformational switch that controls biased signaling in several  
353 GPCRs.

354  
355 The extracellular locations of these biased signaling switches suggest that the sites are  
356 druggable. The signaling regulatory mechanism controlled by specific receptor oligomeric structures  
357 emerging from our study opens new avenues for selective pharmacological treatments that do not  
358 perturb receptor monomeric structures and associated signaling functions.

359  
360 Overall, our approach should prove useful for designing multi-pass membrane protein  
361 associations with novel structures and functions, and expand protein design toolkits for engineered  
362 cell-based therapies and synthetic biology applications.

## 363 364 **References**

- 365 1. Felce, J.H., Davis, S.J. & Klenerman, D. Single-Molecule Analysis of G Protein-Coupled  
366 Receptor Stoichiometry: Approaches and Limitations. *Trends Pharmacol Sci* 39, 96-108 (2018).
- 367 2. Felce, J.H. et al. Receptor Quaternary Organization Explains G Protein-Coupled Receptor  
368 Family Structure. *Cell Rep* 20, 2654-2665 (2017).
- 369 3. Bouvier, M., Heveker, N., Jockers, R., Marullo, S. & Milligan, G. BRET analysis of GPCR  
370 oligomerization: newer does not mean better. *Nat Methods* 4, 3-4; author reply 4 (2007).
- 371 4. Milligan, G. & Bouvier, M. Methods to monitor the quaternary structure of G protein-coupled  
372 receptors. *FEBS J* 272, 2914-25 (2005).

- 373 5. Huang, J., Chen, S., Zhang, J.J. & Huang, X.Y. Crystal structure of oligomeric beta1-  
374 adrenergic G protein-coupled receptors in ligand-free basal state. *Nat Struct Mol Biol* 20, 419-25  
375 (2013).
- 376 6. Manglik, A. et al. Crystal structure of the micro-opioid receptor bound to a morphinan  
377 antagonist. *Nature* 485, 321-6 (2012).
- 378 7. Wu, B. et al. Structures of the CXCR4 chemokine GPCR with small-molecule and cyclic  
379 peptide antagonists. *Science* 330, 1066-71 (2010).
- 380 8. Liang, Y. et al. Organization of the G protein-coupled receptors rhodopsin and opsin in  
381 native membranes. *J Biol Chem* 278, 21655-21662 (2003).
- 382 9. Fotiadis, D. et al. Atomic-force microscopy: Rhodopsin dimers in native disc membranes.  
383 *Nature* 421, 127-8 (2003).
- 384 10. Armando, S. et al. The chemokine CXCR4 and CC2 receptors form homo- and  
385 heterooligomers that can engage their signaling G-protein effectors and betaarrestin. *FASEB J* 28,  
386 4509-23 (2014).
- 387 11. Percherancier, Y. et al. Bioluminescence resonance energy transfer reveals ligand-induced  
388 conformational changes in CXCR4 homo- and heterodimers. *J Biol Chem* 280, 9895-903 (2005).
- 389 12. Whorton, M.R. et al. A monomeric G protein-coupled receptor isolated in a high-density  
390 lipoprotein particle efficiently activates its G protein. *Proc Natl Acad Sci U S A* 104, 7682-7 (2007).
- 391 13. Whorton, M.R. et al. Efficient coupling of transducin to monomeric rhodopsin in a  
392 phospholipid bilayer. *J Biol Chem* 283, 4387-94 (2008).
- 393 14. Meral, D. et al. Molecular details of dimerization kinetics reveal negligible populations of  
394 transient  $\mu$ -opioid receptor homodimers at physiological concentrations. *Sci Rep* 8, 7705 (2018).
- 395 15. Mondal, S. et al. Membrane driven spatial organization of GPCRs. *Sci Rep* 3, 2909 (2013).
- 396 16. Gahbauer, S. & Bockmann, R.A. Membrane-Mediated Oligomerization of G Protein Coupled  
397 Receptors and Its Implications for GPCR Function. *Front Physiol* 7, 494 (2016).



- 398 17. Kobayashi, H., Ogawa, K., Yao, R., Lichtarge, O. & Bouvier, M. Functional rescue of beta-  
399 adrenoceptor dimerization and trafficking by pharmacological chaperones. *Traffic* 10, 1019-33  
400 (2009).
- 401 18. Salahpour, A. et al. Homodimerization of the beta2-adrenergic receptor as a prerequisite for  
402 cell surface targeting. *J Biol Chem* 279, 33390-7 (2004).
- 403 19. Han, Y., Moreira, I.S., Urizar, E., Weinstein, H. & Javitch, J.A. Allosteric communication  
404 between protomers of dopamine class A GPCR dimers modulates activation. *Nat Chem Biol* 5, 688-  
405 95 (2009).
- 406 20. Guo, W., Shi, L., Filizola, M., Weinstein, H. & Javitch, J.A. Crosstalk in G protein-coupled  
407 receptors: changes at the transmembrane homodimer interface determine activation. *Proc Natl*  
408 *Acad Sci U S A* 102, 17495-500 (2005).
- 409 21. Fung, J.J. et al. Ligand-regulated oligomerization of beta(2)-adrenoceptors in a model lipid  
410 bilayer. *EMBO J* 28, 3315-28 (2009).
- 411 22. Yao, X.J. et al. The effect of ligand efficacy on the formation and stability of a GPCR-G  
412 protein complex. *Proc Natl Acad Sci U S A* 106, 9501-6 (2009).
- 413 23. Martinez-Munoz, L. et al. Separating Actin-Dependent Chemokine Receptor Nanoclustering  
414 from Dimerization Indicates a Role for Clustering in CXCR4 Signaling and Function. *Mol Cell* 70,  
415 106-119 e10 (2018).
- 416 24. Das, R. & Baker, D. Macromolecular modeling with rosetta. *Annu Rev Biochem* 77, 363-82  
417 (2008).
- 418 25. Procko, E. et al. A computationally designed inhibitor of an Epstein-Barr viral Bcl-2 protein  
419 induces apoptosis in infected cells. *Cell* 157, 1644-1656 (2014).
- 420 26. Silva, D.A. et al. De novo design of potent and selective mimics of IL-2 and IL-15. *Nature*  
421 565, 186-191 (2019).
- 422 27. Joh, N.H. et al. De novo design of a transmembrane Zn(2)(+)-transporting four-helix bundle.  
423 *Science* 346, 1520-4 (2014).

- 424 28. Wang, Y. & Barth, P. Evolutionary-guided de novo structure prediction of self-associated  
425 transmembrane helical proteins with near-atomic accuracy. *Nat Commun* 6, 7196 (2015).
- 426 29. Yin, H. et al. Computational design of peptides that target transmembrane helices. *Science*  
427 315, 1817-22 (2007).
- 428 30. Qin, L.K., I.; Holden, L.G.; Wang, C.; Zheng, Y.; Zhao, C.; Fenalti, G.; Wu, H.; Han, G.W.;  
429 Cherezov, V.; Abagyan, R.; Stevens, R.C.; Handel, T.M. Structural biology. Crystal structure of the  
430 chemokine receptor CXCR4 in complex with a viral chemokine. *Science* 347, 1117-22 (2015).
- 431 31. Feng, X., Ambia, J., Chen, K.M., Young, M. & Barth, P. Computational design of ligand-  
432 binding membrane receptors with high selectivity. *Nat Chem Biol* 13, 715-723 (2017).
- 433 32. Angers, S. et al. Detection of beta 2-adrenergic receptor dimerization in living cells using  
434 bioluminescence resonance energy transfer (BRET). *Proc Natl Acad Sci U S A* 97, 3684-9 (2000).
- 435 33. Namkung, Y. et al. Monitoring G protein-coupled receptor and beta-arrestin trafficking in live  
436 cells using enhanced bystander BRET. *Nat Commun* 7, 12178 (2016).
- 437 34. Luttrell, L.M. et al. Manifold roles of  $\beta$ -arrestins in GPCR signaling elucidated with siRNA  
438 and CRISPR/Cas9. *Sci Signal* 11(2018).
- 439 35. Wootten, D. et al. The Extracellular Surface of the GLP-1 Receptor Is a Molecular Trigger for  
440 Biased Agonism. *Cell* 165, 1632-43 (2016).
- 441 36. Manglik, A. et al. Crystal structure of the  $\mu$ -opioid receptor bound to a morphinan antagonist.  
442 *Nature* 485, 321-6 (2012).
- 443 37. Vilardaga, J.P. et al. Conformational cross-talk between alpha2A-adrenergic and mu-opioid  
444 receptors controls cell signaling. *Nat Chem Biol* 4, 126-31 (2008).
- 445 38. Kufareva, I. et al. A novel approach to quantify G-protein-coupled receptor dimerization  
446 equilibrium using bioluminescence resonance energy transfer. *Methods Mol Biol* 1013, 93-127  
447 (2013).
- 448 39. Manglik, A. et al. Structure-based discovery of opioid analgesics with reduced side effects.  
449 *Nature* 537, 185-190 (2016).

## 450 **Material and Methods**

### 451 **Modeling CXCR4 inactive state monomer and homodimer structures**

452 The X-ray structure of the antagonist-bound human chemokine receptor CXCR4 homodimer (PDB  
453 code: 3ODU) served as a starting template for modeling the CXCR4 inactive state monomer. After  
454 removal of detergent and lipid molecules, the two receptor molecules were separated from the  
455 dimer structure and the region corresponding to the binding interface was relaxed in implicit lipid  
456 membrane environment (The RMSD between the relaxed structure and the starting antagonist  
457 bound X-ray structure was 0.1 Å over C $\alpha$  atoms). The lowest energy relaxed CXCR4 monomer  
458 structure was selected as a representative model of the CXCR4 inactive state monomer.

459  
460 The symmetric flexible docking mode of RosettaMembrane<sup>28</sup> involving inter-monomer rigid-body  
461 movements and intra-monomer conformational flexibility was then applied to model CXCR4  
462 homodimer inactive state structures. 10,000 homodimer models were generated starting from the  
463 selected CXCR4 inactive state monomer model. The 10% lowest homodimer interface energy  
464 CXCR4 homodimer models were selected and then filtered by inter-protomer angles to select  
465 quaternary structures that had both optimal homodimer binding energies and proper membrane  
466 insertion. Specifically, the relative orientation of the monomers in the X-ray homodimer structure is  
467 characterized by an inter-helical angle between helix 5 of 52 degrees which ensures optimal  
468 membrane embedding. Hence, all models where such angle was no larger than 85 degrees and no  
469 less than -50 degrees were considered compatible with proper embedding. Overall, 80% of the  
470 models selected by interface energy were kept after applying this relative orientation filter.

471  
472 These homodimer models were then clustered by dimer-specific geometric parameters across the  
473 dimer binding interface (i.e.  $\theta$  and  $d$ , as described in **Supplementary Fig.S2**) for major dimer  
474 orientation analysis. We used the hdbscan-clustering method, which is a density-based clustering  
475 method based on hierarchical density estimates<sup>40</sup>. A majority of the models clustered in two large

476 families of distinct dimer conformations (i.e. closed or open) characterized by very different  
477 interhelical angles and distances between TMH5 as described in **Supplementary Fig.S2**. The  
478 lowest energy structure from each cluster was selected as the representative model of each specific  
479 (i.e. closed or open) homodimer conformation.

480

## 481 **Quaternary structure assembly of CXCR4 active state dimer complexes bound to G-protein** 482 **or $\beta$ -arrestin**

483

484 The general strategy for modeling G-protein or  $\beta$ -arrestin-bound CXCR4 active state homodimers  
485 involved the following steps: First, the CXCR4 monomer was modeled in the active state  
486 conformation and then assembled into homodimers. Lastly, the G-protein Gi and  $\beta$ -arrestin-2 were  
487 also modeled and assembled onto the CXCR4 active state dimers to generate an optimal signaling  
488 complex. The same procedure was applied to model the WT and designed CXCR4 quaternary  
489 structures.

490

### 491 Modeling CXCR4 active state monomer structures

492 We applied RosettaMembrane homology modeling method<sup>31,41</sup> to model the agonist-bound  
493 conformations of a CXCR4 active state monomer. We used the nanobody and chemokine-bound  
494 active state viral GPCR (PDB code: 4XT1, Sequence identity = 30%) as a template because it  
495 displayed the highest sequence homology to CXCR4 among active state GPCR structures. 50,000  
496 models of CXCR4 monomer were generated and the 10% lowest energy models were clustered  
497 based on C $\alpha$  RMSD. The cluster centers of the top 10 largest clusters were used to build models of  
498 active state CXCR4 homodimer.

499

### 500 Modeling CXCR4 active state homodimer structures

501 Active state CXCR4 homodimer structures were modeled using the same approach than for the  
502 inactive state models with the exception that 10 starting active state monomer models were  
503 considered. The symmetric flexible docking mode of RosettaMembrane<sup>28</sup> was applied on each  
504 monomer model, and, after filtering by interhelical angle, all homodimer models were pooled  
505 together prior to the final clustering step. The lowest interface energy decoy from the largest  
506 clusters were selected for modeling CXCR4-dimer- $\beta$ -arrestin-2 or CXCR4-dimer-Gi complexes.

507

#### 508 Modeling GPCR-bound $\beta$ -arrestin-2 conformations

509 Arrestin binding to GPCRs mainly involves 3 loops which undergo significant conformational  
510 changes upon receptor binding. Since  $\beta$ -arrestin-2 was never crystallized in complex with a GPCR,  
511 to increase the chance of identifying optimal CXCR4- $\beta$ -arrestin-2 binding modes, we modeled the  
512 receptor-bound conformations of  $\beta$ -arrestin-2 by homology to that of the close homolog arrestin-1  
513 bound to Rhodopsin (Sequence identity = 60%, PDB code: 4ZWJ) using Rosetta homology  
514 modeling. 10,000 models were generated, and the lowest 10% energy models were clustered. The  
515 lowest energy models of the largest clusters (containing at least 2% of the population) were used to  
516 generate CXCR4-dimer- $\beta$ -arrestin-2 complex structures.

517

#### 518 Assembling $\beta$ -arrestin-2-CXCR4 dimer active state complexes

519 A total of eight  $\beta$ -arrestin-2 models were selected for optimal docking assembly to each selected  
520 active CXCR4 homodimer models. Starting conformations were generated by aligning one subunit  
521 of the CXCR4 dimer to Rhodopsin receptor and  $\beta$ -arrestin-2 to visual arrestin in the Rhodopsin-  
522 arrestin X-ray structure (PDB code: 4ZWJ). 5,000 models were generated by flexible docking  
523 perturbation of the starting structure to optimize the interaction between the different domains of  $\beta$ -  
524 arrestin-2 and the intracellular regions of the CXCR4 homodimers. The complexes with the lowest  
525 interface energy were selected as representative conformations of  $\beta$ -arrestin-2 bound to one  
526 CXCR4 homodimer structure model.

527

528 *Assembling Gi-CXCR4 dimer active state complexes*

529 The  $\alpha$ -subunit of the Gi protein (Gai)-CXCR4 dimer structure was modeled before the first X-ray  
530 structure of a GPCR-Gi complex was solved. The GPCR-bound active state conformation of the C-  
531 terminal domain of Gi (including the  $\alpha 5$  C-terminal helix) was modeled from the Gs structure bound  
532 to the beta2 adrenergic receptor (B2AR) (PDB code: 3SN6, Sequence Identity > 40%). The C-  
533 terminal domain model of Gi was grafted onto the N-terminal domain of the GTPyS bound structure  
534 of Gi protein  $\alpha$ -subunit (PDB code: 1GIA) to model the full length GPCR-bound conformation of Gai.  
535 10,000 models were generated and the lowest energy 10% models by total energy were clustered.  
536 The lowest-energy decoys in the largest clusters were used as representative active state Gai to  
537 assemble CXCR4-dimer-Gai complex structures.

538

539 The starting position of Gai for docking onto CXCR4 was generated by aligning Gai and CXCR4 to  
540 the  $\beta$ -2 adrenergic receptor and Gs protein  $\alpha$ -subunit, respectively in their bound active state  
541 structure (PDB code: 3SN6). 5,000 models were generated through perturbation of the starting  
542 structures to refine the interaction between the downstream effector and CXCR4 models. The  
543 docked structures were filtered by interface energy (lowest 1% effector-interface energy) and  
544 clustered. The models with the lowest effector-docking interface energy in the largest clusters were  
545 selected as representative conformation for further analysis.

546

547 **Computational design of CXCR4 dimer conformations with distinct stabilities**

548 Inactive and active state open-dimer and closed-dimer models of the WT receptor served as  
549 starting templates for all design calculations performed using the implicit lipid membrane model of  
550 RosettaMembrane<sup>28,42,43</sup>. Positions at the interface of the two protomers were systematically  
551 scanned *in silico* (~20 positions, 20<sup>20</sup> possible combinations) to search for mutations that would  
552 stabilize the open-dimer or closed-dimer conformation without modifying significantly the stability of

553 each monomer. This strategy ensured that designed mutations would solely affect the structural  
554 and functional properties associated with receptor dimerization. Hence, mutations were selected  
555 according to the quantity  $\Delta E_{interface} = (E_{interface})_{design} - (E_{interface})_{WT}$  where  $E_{interface} = E_{dimer} - 2 * E_{monomer}$   
556 providing  $\Delta E_{monomer} = (E_{monomer})_{design} - (E_{monomer})_{WT}$  remained minimal. Any designed mutation that had  
557 minimal effects on  $\Delta E_{interface}$  (less than 1.0 REU) and/or significantly affected  $\Delta E_{monomer}$  (by more  
558 than 1.0 REU) was systematically discarded. After each step of sequence selection, the structure of  
559 the designed binding interface was refined and optimized using a Monte Carlo Minimization protocol  
560 sampling all conformational degrees of freedom.

561 The distribution between dimer conformations for the final selected designs and the associated  
562 functional effects on the binding to G-protein versus  $\beta$ -arrestin were obtained by performing a final  
563 round of docking simulations where designed monomers were assembled into GPCR dimers and  
564 into complex with G-proteins or  $\beta$ -arrestin as described above for the WT receptor.

565

566 **Modeling  $\mu$ OR active state dimer structures.** Starting from the active state monomeric structure  
567 of  $\mu$ OR bound to the G-protein  $G_i$  (PDB code: 6DDF), homodimer models of the WT receptor were  
568 obtained using the symmetric docking mode of RosettaMembrane described above using the same  
569 parameters than for CXCR4. Representative lowest energy homodimer  $\mu$ OR models were selected  
570 to assemble  $G_i$  and  $\beta$ -arrestin complexes as described above for CXCR4. The bound  $G_i$  structure  
571 resolved in the 6DDF structure was used for docking onto  $\mu$ OR dimer models. Final models were  
572 selected and analyzed using the same unbiased geometric and energetic criteria as for CXCR4.  
573 The effect of the W5.34A mutation was obtained by calculating the quantity  $\Delta E_{interface}$  after  
574 assembling the mutated monomers into GPCR dimers as described in the computational design  
575 section.

576

577 **Calculation of dimerization propensity.** The docking simulations performed using the software  
578 Rosetta do not reliably calculate free energies of protein associations because they neglect  
579 conformational and configurational entropies for example and just provide the enthalpy of a static  
580 structure. Nevertheless, differences in dimerization propensities between receptor variants can be  
581 estimated from the dimer binding energy calculated for the selected open and closed dimer  
582 conformation as follows. In absence of free energies for the monomer and dimer species, we define  
583 a reference state, that of the lowest energy primary dimer conformation of the WT receptor, i.e. the  
584 open dimer:  $(\Delta E_{interface, O})_{WT}$ . We first calculate the difference in dimer binding energies for each  
585 variant and conformation from WT as follows:

586

$$587 (\Delta\Delta E_{interface, Y})_X = (\Delta E_{interface, Y})_X - (\Delta E_{interface, O})_{WT}. \quad (1)$$

588 where X represents WT or any designed receptor variant and Y = O or C and corresponds to the  
589 open and closed conformation, respectively.

590

591 The Boltzmann factors describing the probability of a variant X to occupy the dimer state in a  
592 specific conformation ( $(PD_Y)_X$ , dimerization propensity) relative to WT can be derived as follows:

593

$$594 (PD_Y)_X = \exp(-0.5((\Delta\Delta E_{interface, Y})_X / RT)). \quad (2)$$

595 where the 0.5 factor roughly converts Rosetta Energy Units to kcal/mol. RT is the thermal scaling  
596 factor and equal to 0.593 kcal.mol<sup>-1</sup>.

597

598 The sum of the Boltzmann factors for the open and closed conformation are calculated in the  
599 inactive and active state (reported in **Supplementary Table S2**) and provides an indication whether  
600 a variant has a lower or higher propensity to occupy the dimer state than WT.

601

602 **Reagents and plasmids**



603 CXCL12 was purchased from Cedarlane. Forskolin, isobutylmethyl xanthine (IBMX), AVP and met-  
604 enkephalin were purchased from Sigma. The following plasmids were already described: ~~and~~ HA-  
605 CXCR4<sup>44</sup>,  $\beta$ -arrestin2-LucII<sup>45</sup>,  $\beta$ -arrestin2-YFP<sup>46</sup>,  $G\alpha_{i1}$ -91RLucII<sup>44</sup>,  $G\alpha_s$ -117RLucII<sup>47</sup>,  $G\alpha_{oA}$ -  
606 91RLucII<sup>48</sup>, GFP10-G<sub>V1</sub><sup>49</sup>, GFP10-G<sub>V2</sub><sup>50</sup>, GFP10-EPAC-RLucII<sup>51</sup>, rGFP-CAAX<sup>33</sup>. The cloning of  
607 CXCR4-RLuc and CXCR4-YFP in pcDNA3.1 was previously described<sup>11</sup>. In the present study,  
608 CXCR4-RLuc and CXCR4-YFP were amplified and modified by PCR at the N-terminal end to add a  
609 myc epitope (EQKLISEEDL) or a HA epitope (YPYDVPDYA), respectively. Myc-CXCR4-RLuc and  
610 HA-CXCR4-YFP segments were then subcloned into pIRESHyg3 (BsrG1/AfIII) and pRESpuro3  
611 (Nhe1/AfIII) respectively. The human  $\mu$ OR and V2R were amplified with a SNAP tag at their N-  
612 terminal (NEB) and subcloned in the pcDNA4/TO plasmid (Invitrogen). All the mutants were  
613 obtained by site directed mutagenesis using the extension of overlapping gene segments by PCR  
614 technique and validated by sequencing.

615

### 616 **Cell culture and Transfections**

617 Human Embryonic Kidney 293 T cells (HEK293T cells) were cultured using Dulbecco's Modified  
618 Eagle Medium (DMEM with L-glutamine from Wisent) supplemented with 10% vol/vol Fetal Bovine  
619 Serum (Wisent). The day before transfection, 600,000 cells were seeded in 6-well plates. Transient  
620 transfections were performed using Polyethylenimine 25Kd linear (PEI, Polysciences) as  
621 transfection agent, with a 3:1 PEI:DNA ratio.

622

623 U87.MG cells stably expressing HA-CXCR4 and HA-CXCR4-W195<sup>5.34</sup>L mutant (U87.CXCR4 and  
624 U87.CXCR4-W195<sup>5.34</sup>L, respectively) were established by transfection of pIRES-HA-CXCR4 and  
625 pIRES-HA-CXCR4-W195<sup>5.34</sup>L and subsequent cell sorting for equivalent surface expression levels  
626 using 1:1000 Alexa Fluor 488-labeled anti-HA antibody (clone 16B12, Biolegend). U87 cells were  
627 grown in Dulbecco's modified Eagle medium (Thermo Fischer Scientific) supplemented with 15%

628 vol/vol foetal bovine serum and penicillin/streptomycin (100 Units/ml and 100 µg/ml) (Thermo  
629 Fischer Scientific). U87.CXCR4 and U87.CXCR4-W195<sup>5,34</sup>L cell lines were maintained under  
630 puromycin (0.5 µg/ml) selective pressure.

631

### 632 **BRET measurements**

633 Two different BRET configurations were used in this study: BRET<sub>480</sub>-YFP and BRET<sub>400</sub>-GFP10.  
634 BRET<sub>480</sub>-YFP uses RLuc as energy donor and YFP as the acceptor (excitation peak at 488nm)  
635 and coelenterazine-h (coel-h, Nanolight Technology) was used as the substrate (emission peak at  
636 480nm). BRET<sub>400</sub>-GFP10 uses RLucII as energy donor and GFP10 as the acceptor (excitation  
637 peak at 400nm) and coelenterazine-400a (coel-400a, Nanolight Technology) was used as the  
638 substrate (emission peak at 400nm). Enhanced bystander BRET (ebBRET) uses RLucII as energy  
639 donor, rGFP as the acceptor and is detected using the BRET<sub>480</sub>-YFP configuration and Prolume  
640 Purple as the substrate (NanoLight Technology). BRET was measured with a Mithras LB940  
641 multimode microplate reader (Berthold Technologies) equipped with a BRET<sub>480</sub>-YFP filters set  
642 (donor 480 ± 20 nm and acceptor 530 ± 20 nm filters) or a Tristar microplate reader equipped either  
643 with a BRET<sub>480</sub>-YFP filters set (donor 480 ± 20 nm and acceptor 530 ± 20 nm filters) or a  
644 BRET<sub>400</sub>-GFP10 filters set (donor 400 ± 70 nm and acceptor 515 ± 20 nm filters). All the BRET  
645 experiments were performed at room temperature.

### 646 CXCR4 dimerization

647 Cells were transfected with HA-CXCR4-YFP and myc-CXCR4-RLuc, WT or mutant, and seeded in  
648 96-well plates (Culturplate, Perkinelmer) coated with poly-L-ornithine (Sigma-Aldrich) 24h after  
649 transfection. The following day, cells were washed with Hank's Balanced Salt Solution (HBSS,  
650 Invitrogen) and incubated in HBSS supplemented with 0.1% BSA. Cells were treated with CXCL12  
651 at the indicated times and concentrations. Coel-h (2.5 µM) was added 10 min before reading.

652 *G protein activation*

653 Cells were transfected with the receptor (CXCR4, V2R or  $\mu$ OR) and a three-component BRET-  
654 based biosensor: Gai1-RlucII (CXCR4), Gas117RlucII (V2R) or Gao-RlucII ( $\mu$ OR) and G $\beta$ 1, and  
655 Gy1-GFP10 (V2R and  $\mu$ OR) or Gy2-GFP10 (CXCR4). BRET was then monitored as described  
656 above using coel-400a as a substrate. The dissociation of the G $\alpha$  and G $\beta$ /G $\gamma$  subunits after  
657 activation leads to a decrease in the BRET ratio.

658  *$\beta$ -arrestin engagement (direct interaction)*

659 Cells were transfected with CXCR4-Rluc and  $\beta$ -arrestin2-YFP. BRET was monitored as described  
660 above using Coel-h as a substrate.

661  *$\beta$ -arrestin engagement (ebBRET)*

662 Cells were transfected with the receptor (HA-CXCR4, SNAP-V2R or SNAP- $\mu$ OR),  $\beta$ -arrestin2-  
663 RLucII and CAAX-rGFP. BRET was monitored as described above using Coel-h. BRET was  
664 monitored as described above using Prolume Purple (1.3  $\mu$ M) as a substrate.

665 *cAMP accumulation*

666 Cells were transfected with HA-CXCR4 and the BRET-based biosensor GFP10-EPAC1-RlucII.  
667 BRET was then monitored as described above with the cells first washed with HBSS and then  
668 incubated in HBSS + 0.1% BSA containing 500  $\mu$ M isobutylmethyl xanthine (IBMX), without or with  
669 10  $\mu$ M forskolin for 15 min, followed by agonist stimulation.

670 **ERK phosphorylation assay monitored by HTRF**

671 U87, U87.CXCR4 and U87.CXCR4-W195<sup>5.34</sup>L cells were seeded in 96-well plates (1 x 10<sup>4</sup> cell/well).  
672 72 hours later, culture medium was replaced with FBS-free, phenol-red free DMEM. After 4-hour

673 starvation, CXCL12 was added to cells at a final concentration of 10 nM and incubated for the  
674 indicated times. ERK phosphorylation was evaluated using a Homogenous Time-Resolved FRET  
675 (HTRF)-based Phospho-ERK (Thr202/Tyr204) cellular kit (Cisbio). Cells were lysed for 30 minutes  
676 with the lysis buffer provided and incubated for 2 hours with pERK1/2-specific antibodies  
677 conjugated with Eu<sup>3+</sup>-cryptate donor and d2 acceptor at recommended dilutions. HTRF was  
678 measured with Tecan GENios Pro plate reader equipped with 612 ± 10 (donor) and 670 ± 25  
679 (acceptor) filters. HTRF ratio was calculated as follows:

$$Ratio = \frac{A_{670}}{D_{612}} \times 10000$$

680

681  $A_{670}$  = emission at 670 nm (RFU)

682  $D_{612}$  = emission at 612 nm (RFU)

683

#### 684 **Elisa**

685 To control for the cell surface expression of HA-CXCR4, HA-CXCR4-YFP and myc-CXCR4-RLuc,  
686 and their respective mutant receptors, ELISA were performed in parallel of BRET experiments,  
687 using an antibody directed at the extracellular epitope (HA or Myc). 24h after transfection, cells  
688 were seeded in 24-well plates coated with poly-L-ornithine. The day of the experiment, media was  
689 removed and a solution of PBS with 3.7% paraformaldehyde was added for 5 min. Cells were then  
690 washed 3 times with Phosphate Buffered Saline (PBS). Blocking solution (PBS + 1% BSA) was  
691 added for 45 min then replaced by PBS + 1% BSA containing HA antibody 1:1000 (12CA5,  
692 Santacruz) or Myc antibody 1:1000 (D84C12, Cell Signaling) for 45 min. After antibody addition,  
693 cells were washed three times with PBS and incubated 45 min with PBS+1% BSA containing an  
694 anti-mouse HRP antibody (1:2000). After labelling, cells were washed three times with PBS and  
695 incubated with SigmaFastOPD (SigmaAldrich) at room temperature. Reaction was stopped using

696 3N HCl, supernatant transferred in a 96-well plate, and reading was performed using a Spectramax  
697 multimode microplate reader (molecular devices) at 492nm.

698

### 699 **Flow cytometry**

700 Endogenous CXCR4 expression on the surface of HEK and U87 cells was monitored by flow  
701 cytometry using CXCR4-specific phycoerythrin-conjugated mAb 12G5 or the corresponding isotype  
702 control (1:20, R&D Systems) in a BD FACS LSR Fortessa cytometer (BD Biosciences). U87 were  
703 chosen as cellular background for the absence of endogenous CXCR4 and ACKR3, as previously  
704 demonstrated<sup>52,53</sup>. U87 cells stably expressing the HA-tagged CXCR4 or variants thereof were  
705 obtained following puromycin selection and subsequent single-cell sorting using BD FACSAria II  
706 cell sorter (BD Biosciences). Equivalent surface expression level was verified using an Alexa Fluor  
707 488-conjugated anti-HA-tag mAb (clone 16B12, 1:1000 Biolegend). Flow cytometry data were  
708 analyzed using FlowJo V10 software.

709

### 710 **Data and statistical analysis**

711 All data were analysed using GraphPad Prism (GraphPad Software, Inc). Statistical significance  
712 between the groups was assessed with a one-way ANOVA followed by Tukey's post hoc test.

713

### 714 **References (Material and Methods)**

715 40. McInnes, L.H., J.; Astels, S. hdbscan: Hierarchical density based clustering. Journal of Open  
716 Source Software 2(2017).

717 41. Chen, K.Y., Sun, J., Salvo, J.S., Baker, D. & Barth, P. High-resolution modeling of  
718 transmembrane helical protein structures from distant homologues. PLoS Comput Biol 10,  
719 e1003636 (2014).

720 42. Barth, P., Schonbrun, J. & Baker, D. Toward high-resolution prediction and design of  
721 transmembrane helical protein structures. Proc Natl Acad Sci U S A 104, 15682-7 (2007).

- 722 43. Chen, K.Y., Zhou, F., Fryszczyn, B.G. & Barth, P. Naturally evolved G protein-coupled  
723 receptors adopt metastable conformations. *Proc Natl Acad Sci U S A* 109, 13284-9 (2012).
- 724 44. Quoyer, J. et al. Pepducin targeting the C-X-C chemokine receptor type 4 acts as a biased  
725 agonist favoring activation of the inhibitory G protein. *Proc Natl Acad Sci U S A* 110, E5088-97  
726 (2013).
- 727 45. Paradis, J.S. et al. Receptor sequestration in response to beta-arrestin-2 phosphorylation by  
728 ERK1/2 governs steady-state levels of GPCR cell-surface expression. *Proc Natl Acad Sci U S A*  
729 112, E5160-8 (2015).
- 730 46. Khoury, E., Nikolajev, L., Simaan, M., Namkung, Y. & Laporte, S.A. Differential regulation of  
731 endosomal GPCR/beta-arrestin complexes and trafficking by MAPK. *J Biol Chem* 289, 23302-17  
732 (2014).
- 733 47. Thomsen, A.R.B. et al. GPCR-G Protein- $\beta$ -Arrestin Super-Complex Mediates Sustained G  
734 Protein Signaling. *Cell* 166, 907-919 (2016).
- 735 48. Busnelli, M. et al. Functional selective oxytocin-derived agonists discriminate between  
736 individual G protein family subtypes. *J Biol Chem* 287, 3617-29 (2012).
- 737 49. Galés, C. et al. Probing the activation-promoted structural rearrangements in preassembled  
738 receptor-G protein complexes. *Nat Struct Mol Biol* 13, 778-86 (2006).
- 739 50. Gales, C. et al. Real-time monitoring of receptor and G-protein interactions in living cells.  
740 *Nat Methods* 2, 177-84 (2005).
- 741 51. Zimmerman, B. et al. Differential beta-arrestin-dependent conformational signaling and  
742 cellular responses revealed by angiotensin analogs. *Sci Signal* 5, ra33 (2012).
- 743 52. Szpakowska, M. et al. Human herpesvirus 8-encoded chemokine vCCL2/vMIP-II is an  
744 agonist of the atypical chemokine receptor ACKR3/CXCR7. *Biochem Pharmacol* 114, 14-21 (2016).
- 745 53. Szpakowska, M. et al. Mutational analysis of the extracellular disulphide bridges of the  
746 atypical chemokine receptor ACKR3/CXCR7 uncovers multiple binding and activation modes for its  
747 chemokine and endogenous non-chemokine agonists. *Biochem Pharmacol* 153, 299-309 (2018).

748

749

## 750 **Acknowledgements**

751 This work was supported by a grant from the National Institute of Health (1R01GM097207), a grant  
752 from the Swiss National Science Foundation (31003A\_182263), a supercomputer allocation from  
753 XSEDE (MCB120101) to P.B., and a grant from the Canadian Institute for health Research (CIHR)  
754 (Foundation grant #148431) to M.B.. P.B. was also supported by funds from EPFL and the Ludwig  
755 Institute for Cancer Research. M.S. and A.C. were supported by the Luxembourg Institute of Health  
756 (LIH) MESR (grants 20160116 and 20170113) and the Luxembourg National Research Fund  
757 (INTER/FWO “Nanokine” - grant 15/10358798). J.P. had studentships from the ‘Groupe de  
758 Recherche Universitaire sur le Médicament’ and ‘la Faculté des Études Supérieures et  
759 postdoctorales de l’Université de Montréal’. B.M. had a fellowship from the ‘Fondation pour la  
760 Recherche Médicale (France). M.B. Holds a Canada Research Chair in Signal Transduction and  
761 Molecular Pharmacology. The authors thank Dr. Monique Lagacé for her critical reading of the  
762 manuscript.

763

## 764 **Author contributions**

765 P.B., A.C. and M.B. designed the study; X.F., R.J. and P.B. performed the modeling and design  
766 calculations; J.S.P., B.M., M.S., M.H., N.D.B. and F.M.H. performed the experiments under the  
767 supervision of M.B, A.C. and M.J.S.; All authors analyzed the data; P.B., J.S.P., X.F. and M.B.  
768 wrote the manuscript.

769

## 770 **Data availability**

771 The authors declare that all data supporting the findings in this study are presented within the  
772 article and its Supplementary Information files. All the biosensors can be obtained and used  
773 without limitations for non-commercial purpose with a standard academic materials transfer

774 agreement (MTA) on request. The data that support the findings of this study are available from  
775 the corresponding author upon reasonable request.

776

777 **Code availability.**

778 The details (i.e. input files and command lines) of the calculations performed in this study as  
779 well as the source codes and executables of the modeling and design methods are available  
780 from the corresponding authors upon request and will be released free of charge for academic  
781 users in the software Rosetta.

782

783 **Competing Interests statement**

784 The authors declare no competing interest

785



786 **Figure legends**

787

788 **Figure 1. Computational modeling and design of GPCR associations with reprogrammed**

789 **structures and functions. a.** Framework for the modeling and design of specific receptor

790 quaternary active state conformations eliciting various degree of functional selectivity. The WT

791 receptor modeled in the active state is assembled into dimers and then into ternary complex with G-

792 proteins (green) or  $\beta$ -arrestin (orange) to identify the distribution of quaternary conformations and

793 their ability to recruit intracellular signaling proteins. The dimer binding interface is redesigned to

794 stabilize and/or destabilize specific quaternary conformations. This design strategy enhances the

795 quaternary conformational selectivity of the receptor and reprograms the functional bias of the

796 receptor oligomer (**Supplementary Fig.S1, Methods**). **b.** Quaternary structural changes act as a

797 functional switch as the closed-dimer conformation interferes with the binding of a GPCR monomer

798 to  $\beta$ -arrestin. **c.** Mutations designed to selectively stabilize the CXCR4 open-dimer conformation

799 without affecting CXCR4 monomer stability were identified in the extracellular and TMH regions. **d.**

800 Mutations designed to selectively stabilize the CXCR4 closed-dimer conformation without affecting

801 CXCR4 monomer stability were identified in the extracellular region. Key atomic contacts are

802 represented as red dotted lines. **e, f.** Schematic conformational energy landscapes of CXCR4

803 dimerization in the inactive (**e**) and active (**f**) states. The conformational energies reported in

804 **Supplementary Table S1** were used to plot the energy curves.

805

806 **Figure 2. CXCR4 association and Gi activation. a.** (Left) Schematic representation of the CXCR4

807 dimerization BRET-based assay. (Right) CXCR4 association measured by BRET before (black) and

808 after agonist stimulation (grey) in HEK293T cells transfected with CXCR4-RLuc and its counterpart

809 CXCR4-YFP, WT or mutant as indicated. BRET<sub>480</sub>-YFP was measured after the addition of coel-h

810 (10 min) and CXCL12 (15 min). **b.** (Left) Schematic representation of the BRET-based ligand-

811 induced Gi activation assay. (Right) CXCL12-promoted Gi activation measured by BRET in

812 HEK293T cells transfected with HA-CXCR4, WT or mutant as indicated, G $\alpha$ i1-RLucII, G $\beta$ 1 and  
813 G $\gamma$ 2-GFP10. BRET400-GFP10 was measured after the addition of coel-400a (10min) and CXCL12  
814 (3 min) **c.** (Left) Schematic representation of the BRET-based EPAC sensor to measure cAMP  
815 production. (Right) CXCL12-promoted EPAC inhibition was measured by BRET in HEK293T cells  
816 transfected with HA-CXCR4, WT or mutant as indicated, and RLuc-EPAC-YFP. BRET480-YFP,  
817 reporting the conformation rearrangement of the EPAC sensor from an open to a close  
818 conformation, was measured after addition of coel-h (10 min) and CXCL12 (5 min). CXCR4  
819 mutations predicted to stabilize the open-dimer or the closed-dimer conformation are annotated with  
820 a blue or red dimer symbol, respectively. Data are expressed as net BRET (calculated by  
821 subtracting background luminescence) or  $\Delta$ BRET (agonist-promoted BRET). Data shown represent  
822 the mean  $\pm$  SEM of at least three independent experiments. \*\*\*p < 0.001; n.s., not significant. † is  
823 used to compare basal values between the mutants and \* to compare basal to CXCL12 treated  
824 conditions.

825

826 **Figure 3.  $\beta$ -arrestin recruitment and ERK activation.** **a.** (Left) Schematic representation of the  
827 BRET-based ligand-induced  $\beta$ -arrestin 2 ( $\beta$ arr2) translocation assay. (Right) CXCL12-promoted  
828  $\beta$ arr2 recruitment to CXCR4 measured by BRET in HEK293T cells transfected with CXCR4-RLuc,  
829 WT or mutant as indicated, and  $\beta$ arr2-YFP. BRET480-YFP between CXCR4-RLuc and  $\beta$ arr2-YFP  
830 was measured after the addition of coel-h (10 min) and CXCL12 (15 min). Data are represented as  
831  $\Delta$ BRET **b.** (Left) Schematic representation of ERK activation by CXCR4. (Right) ERK  
832 phosphorylation in U87 stably expressing equivalent levels of WT and W195<sup>5,34</sup>L CXCR4 induced  
833 by stimulation with 10 nM CXCL12 for the indicated times was monitored by HTRF. CXCR4  
834 mutations predicted to stabilize the open-dimer or the closed-dimer conformation are annotated with  
835 a blue or red dimer symbol, respectively. Data shown represent the mean  $\pm$  SEM of at least three  
836 independent experiments.

837

838 **Figure 4. Distinct quaternary structures selectively control G-protein and  $\beta$ -arrestin**

839 **recruitment. a.** Surface representation of the CXCR4 inactive state monomeric structure

840 highlighting the distinct oligomerization interfaces controlling either  $\beta$ -arrestin recruitment

841 (extracellular side and TM core of TMH5, blue) or Gi activation and nanocluster formation<sup>23</sup>

842 (intracellular side of TMH6, orange). **b.** The hotspot binding sites controlling CXCR4 oligomerization

843 through TMH5 (designed residues in red) are poorly conserved in the chemokine receptor family,

844 except for the  $\beta$ -arrestin signaling switch W5.34. Aromatic residues are highly enriched at position

845 5.34 of other dimerizing GPCR families. **c.** Conserved position and conformation of W5.34 in

846 human chemokine receptor X-ray structures. Superposition of W5.34 conformations is shown in the

847 center. **d.** Conservation of the  $\beta$ -arrestin signaling switch in the vasopressin/oxytocin receptors and

848 opioid receptors.

849

850 **Figure 5. W5.34 is a common biased signaling switch in dimerizing peptide-binding GPCRs.**

851 **a, b.** Ligand-promoted Gs (V2R) or Go ( $\mu$ OR) and  $\beta$ arr2 recruitment to the membrane in the

852 presence of V2R-WT or V2R-W200<sup>5.33</sup>A (**a**), and  $\mu$ OR-WT or  $\mu$ OR-W230<sup>5.34</sup>A (**b**). Gs and Go

853 activation were detected by monitoring the dissociation between G $\alpha$  and G $\beta\gamma$  by BRET whereas  $\beta$ -

854 arrestin recruitment to the plasma membrane was assessed in cells transfected with rGFP-CAAX,

855 WT or mutant receptors, as indicated, and  $\beta$ arr2-RlucII. Data are represented as  $\Delta$ BRET and were

856 normalized to the maximal response of the WT receptor. \* $p < 0.05$ ; \*\*\* $p < 0.001$ .

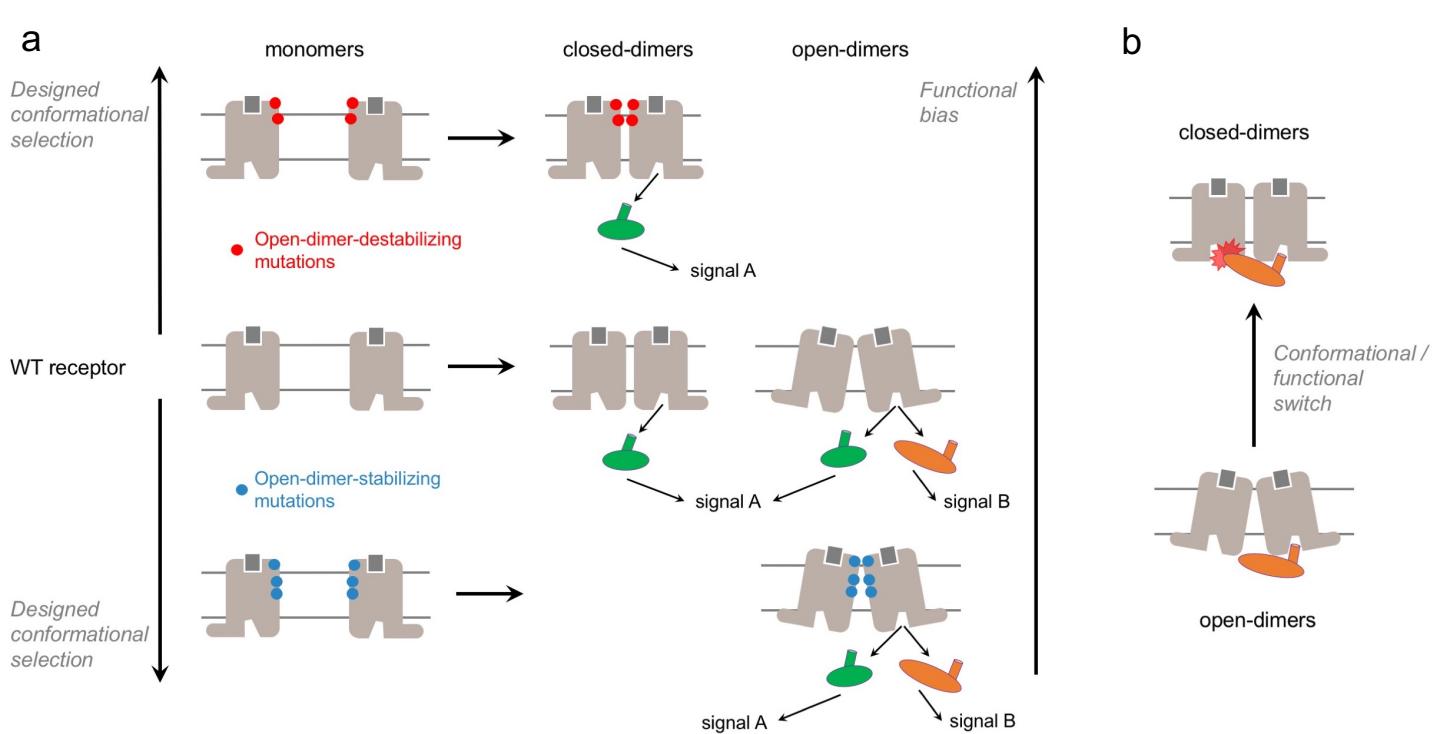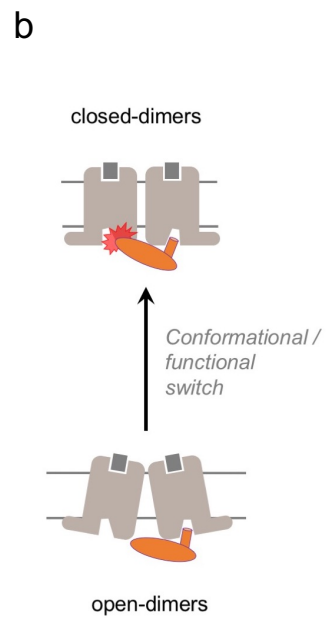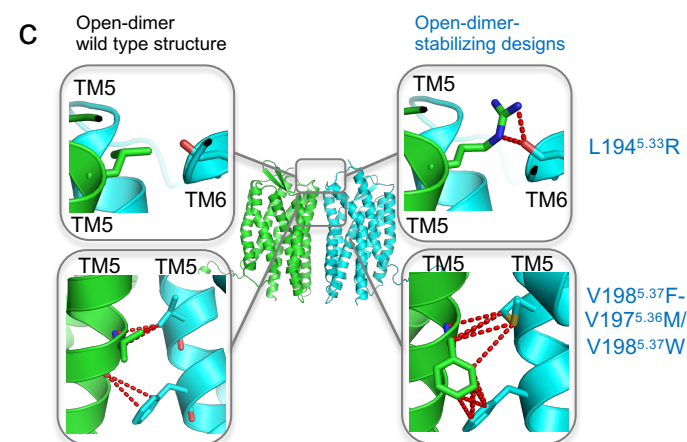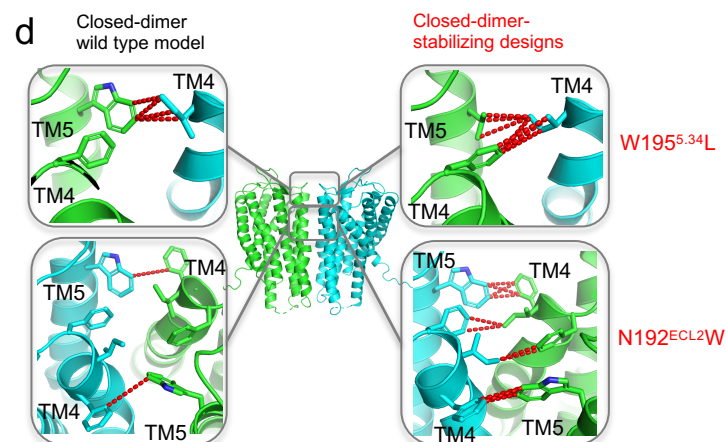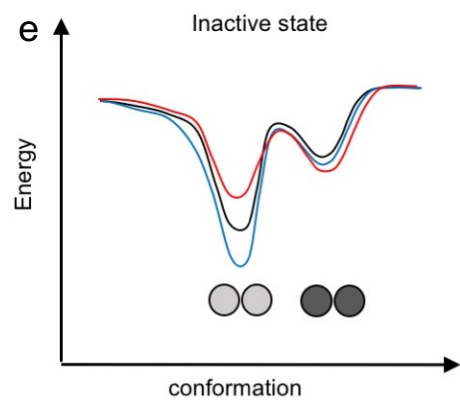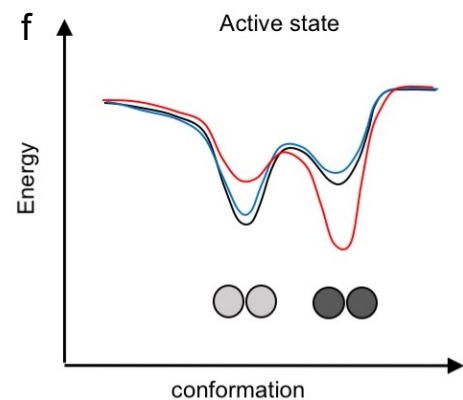

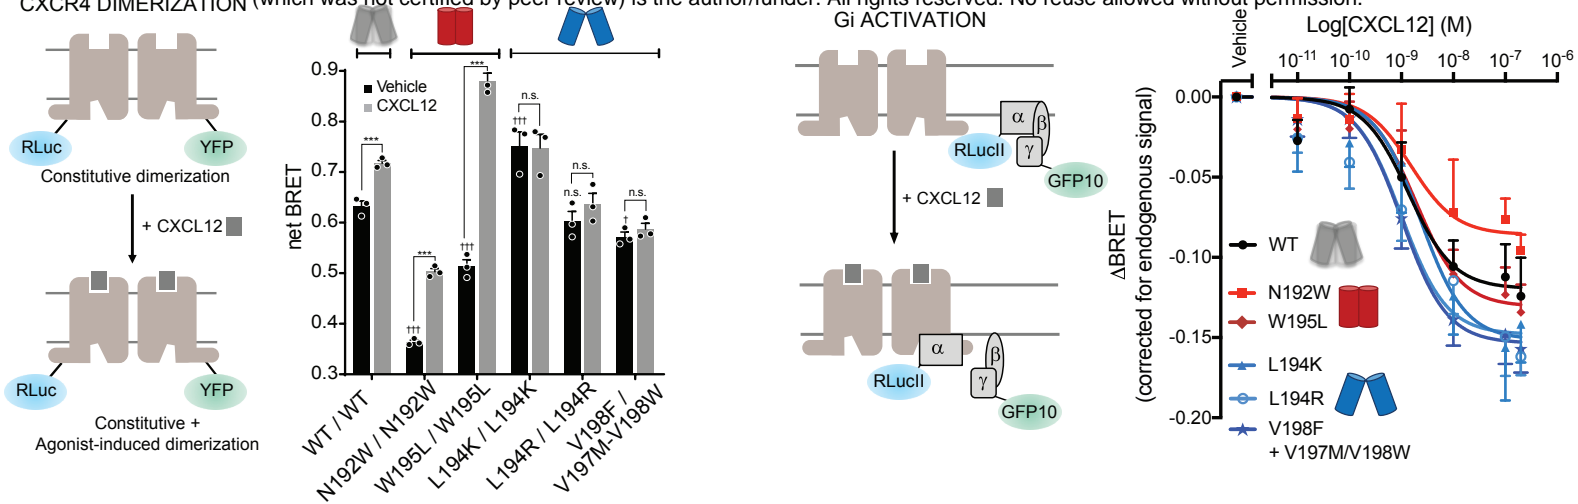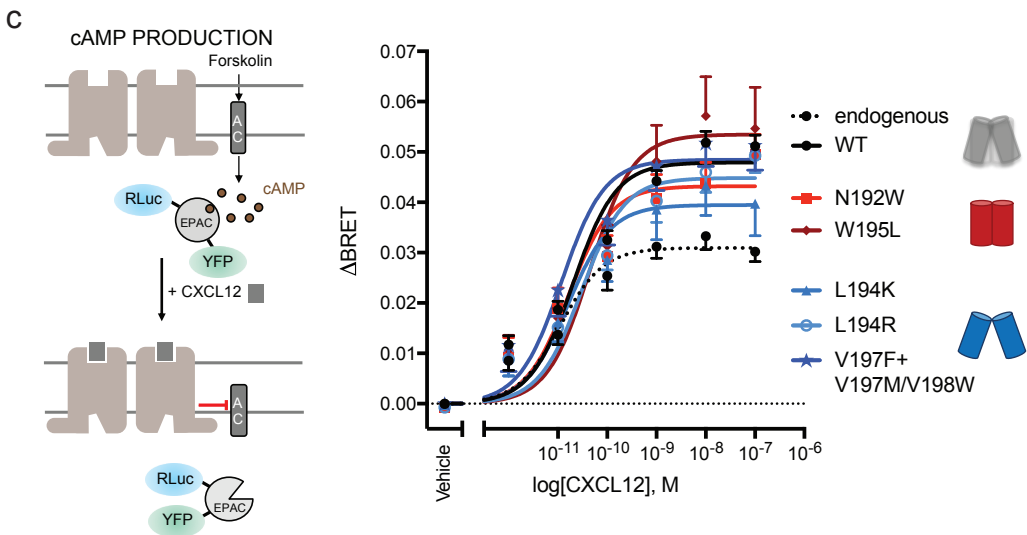

### a $\beta$ ARR2 RECRUITMENT TO CXCR4

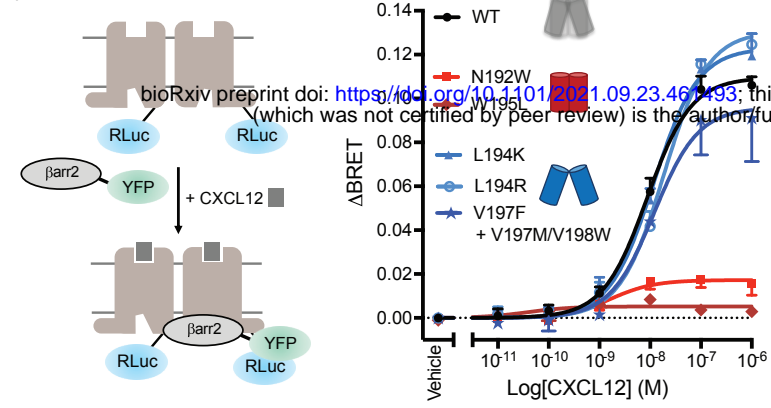

### b ERK ACTIVATION

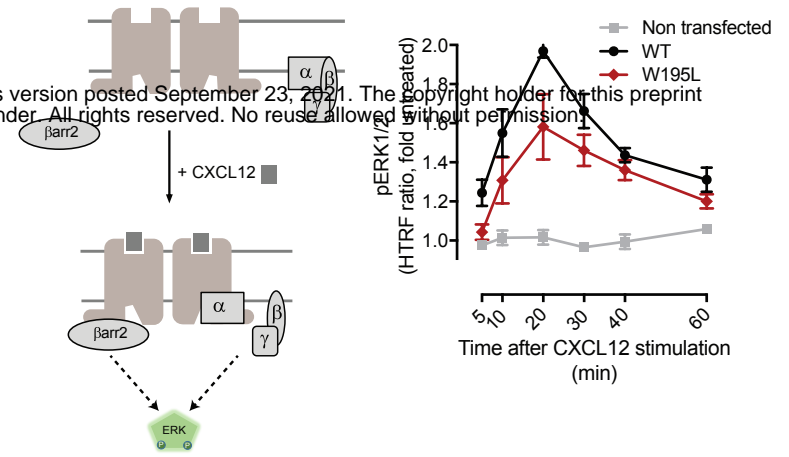

a

$\beta$ -arrestin bias  
dimer switch

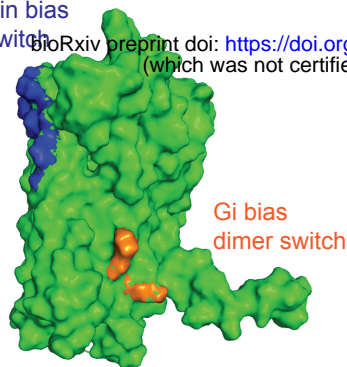

c

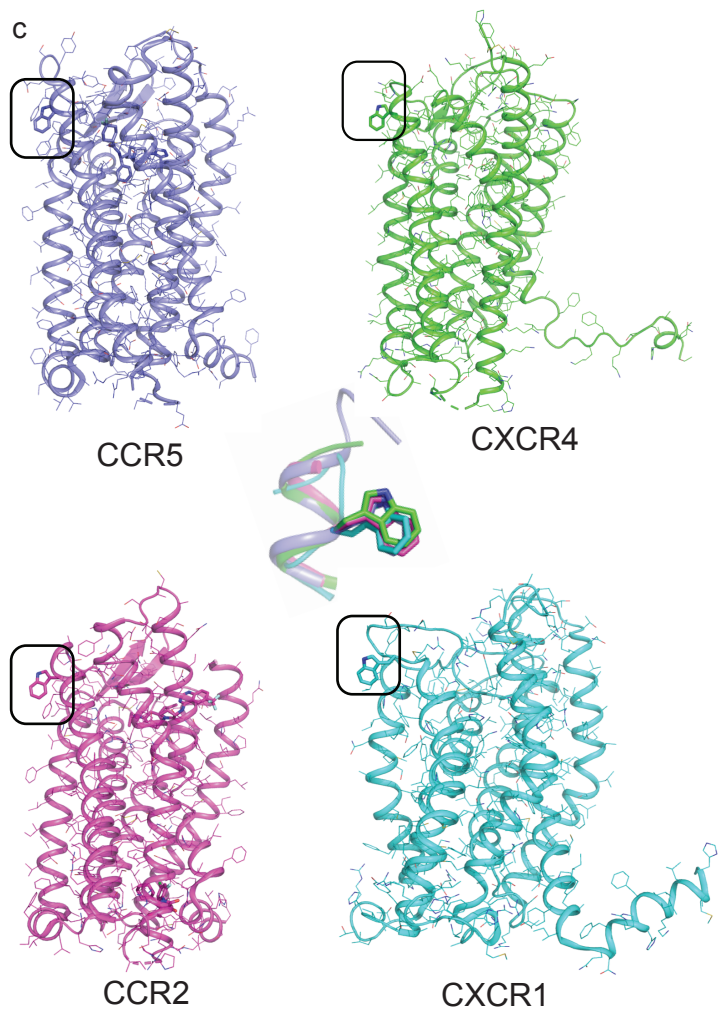

b

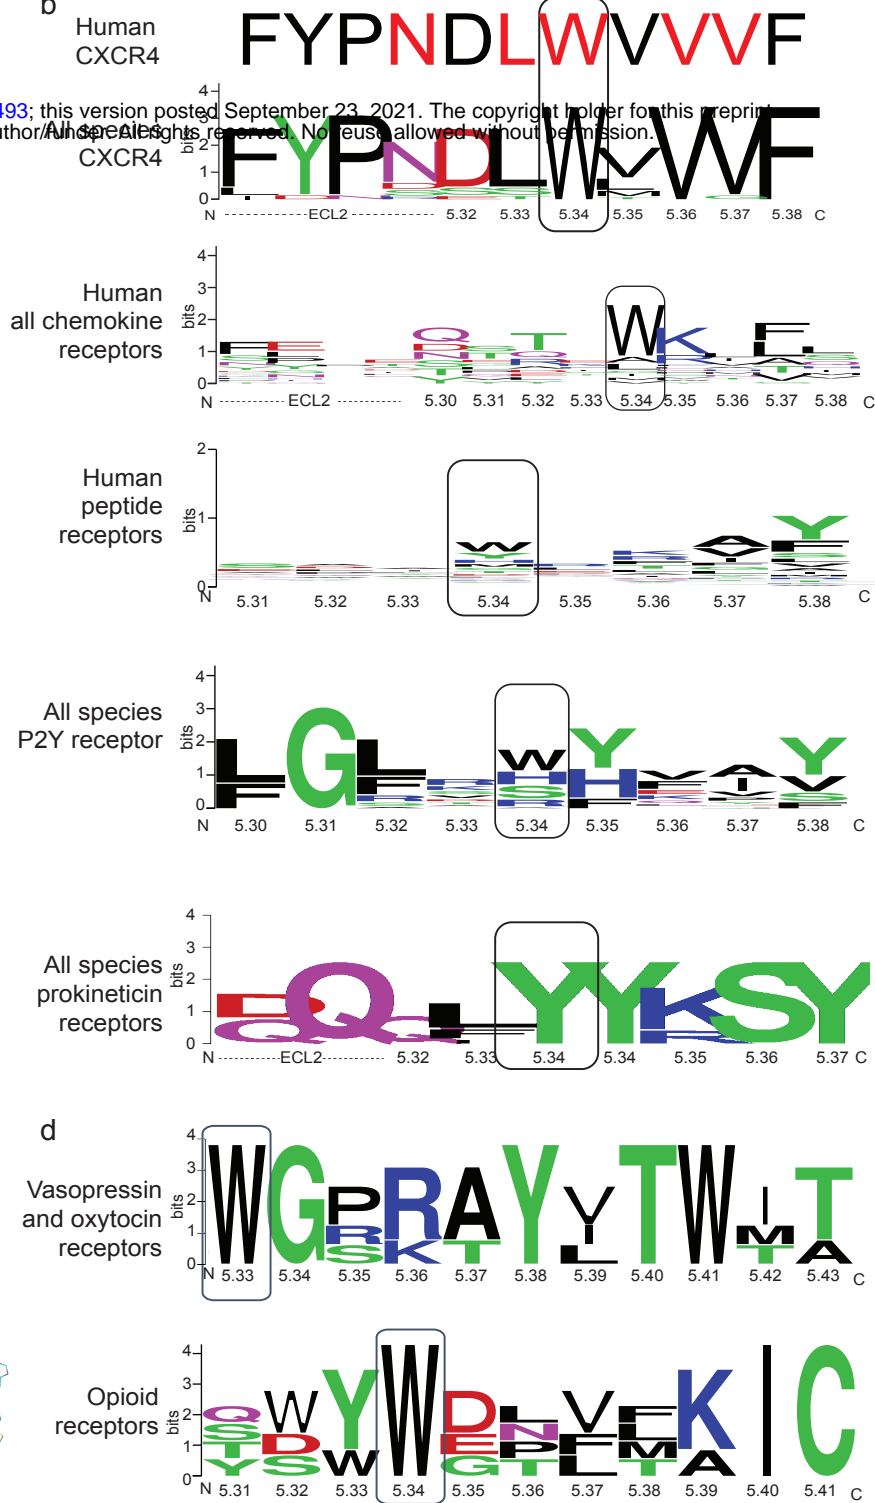

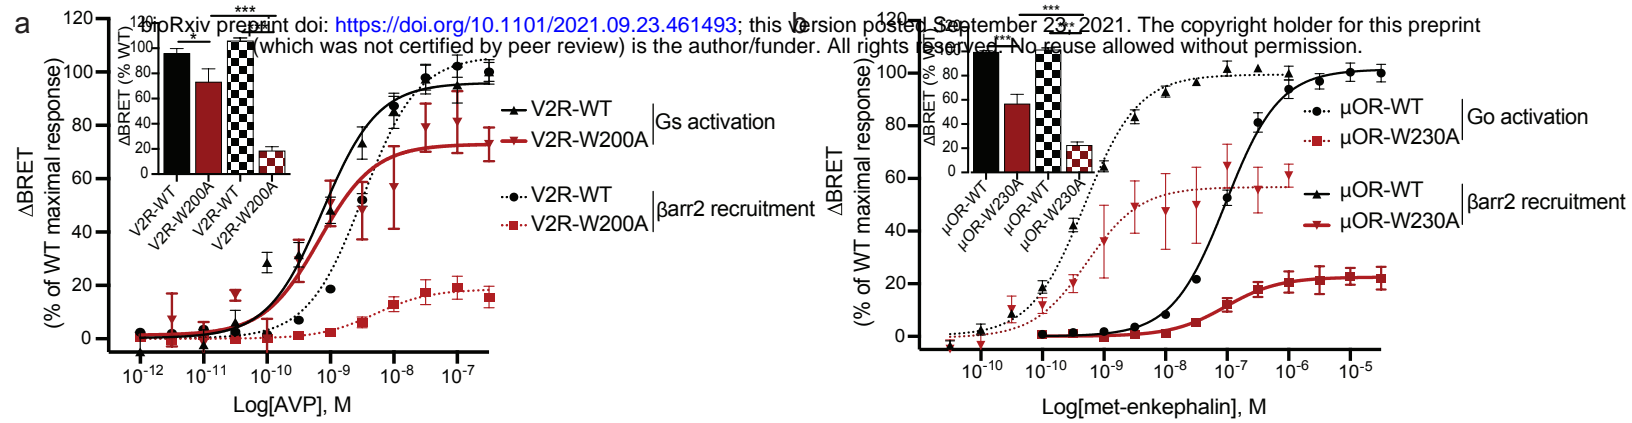



Computational  
simulation

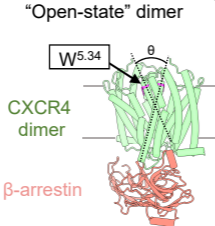

“Closed-state” dimer

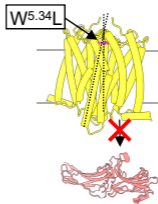

Experimental  
validation

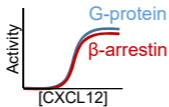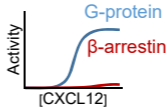

Source: https://www.biorxiv.org/content/biorxiv/early/2021/09/23/2021.09.23.461493.full.pdf
